# Supplementary material
Source: Research Square preprint supplement (doi:10.21203/rs.3.rs-10001941/v1)
Supplement: Supplementary file 1 [file 21a811eb03477c965bc5bc5e.xlsx]

## Sheet: Sheet1
Supplementary Dataset S1. The geochemical data for the glasses from U1582.
	SiO2	TiO2	Al2O3	FeO	MgO	MnO	CaO	Na2O	K2O	P2O5	NiO	Total	Ce/Pb	Nb/U	Ce (ppm)	H2O/Ce	H2O (wt.%)	CO2 (ppm)	F (ppm)	S (ppm)	Cl (ppm)	B Content (ppm)	2σ	δ11B (‰)	2σ	δD (‰)	2σ	Ce/Pb 1	Nb/U1	Ce1	H2O/Ce1
1582B 5R2W 102/104	51.669	1.168	13.7923	13.1173	6.34967	0.213333	11.0103	2.44767	0.11	0.0883333	0	99.966	20.7215	37.2848	6.67858	656.471	0.43843	3.40257	133.413	1041.18	940.951	2.27932	0.0347292	-4.27413	2.78883	-74.2062	7.55026	20.1594	38.2008	7.07	620.127
1582B 3R1W 124/127	51.4517	1.15367	13.809	12.9403	6.33933	0.21	11.1593	2.41567	0.109667	0.0866667	0.01	99.6853	21.2425	42.8659	7.06217	654.996	0.46257	1.78079	137.31	986.82	761.782	2.1838	0.0332725	-4.48797	2.95833	-80.7982	10.7266
1582B 3R1W 52/59	51.4147	1.18867	13.816	12.9603	6.38433	0.211667	11.1113	2.467	0.107	0.0906667	0.004	99.7557	22.2897	42.3281	6.79604
1582B 3R3W 24/25	51.3293	1.21367	13.649	13.4603	6.21867	0.211667	10.9327	2.07267	0.119667	0.0883333	0.00533333	99.3013	20.0837	39.0517	7.16103	644.655	0.46164	2.76916	140.157	994.65	839.927	2.26873	0.0345419	-5.87764	2.67071	-77.9253	9.75499	20.1421	39.1618	7.62	605.826
1582B 4R1W 128/131	51.557	1.20367	13.7333	12.8817	6.29633	0.207333	11.001	2.48067	0.112333	0.0923333	0.00866667	99.5743	21.1027	41.0027	6.91478	653.251	0.451709	2.17248	138.537	977.856	832.042	2.27857	0.0350528	-5.67791	2.66143	-72.115	9.95018
1582B 4R2W 31/40	51.579	1.18967	13.7833	12.896	6.31667	0.210667	11.02	2.46233	0.118	0.0926667	0.00666667	99.675	21.77	42.4817	6.94107	640.495	0.444572	2.23949	137.476	971.611	838.51	2.24386	0.0341305	-0.193628	2.64724	-82.419	10.0552
1582B 4R2W 86/88	51.5273	1.19	13.8047	12.9403	6.33833	0.206333	11.042	2.46433	0.116	0.0926667	0.00533333	99.7273	25.1507	39.1124	6.95195	647.293	0.449995	1.93213	138.573	970.247	871.402	2.28359	0.0349829	-2.94957	2.86029	-76.0721	10.9873
1582B 5R1W 73/79	51.2463	1.17467	13.547	13.1397	6.28833	0.204667	10.8977	2.49633	0.108667	0.0916667	0.000666667	99.1957	21.8104	34.1853	6.98389	642.131	0.448457	2.60312	136.205	1066.73	962.788	2.30008	0.0349848	-3.93112	2.58981	-80.9899	8.8015
1582B 2R2W 120/124	51.255	1.17367	13.5677	13.2297	6.37	0.206667	11.1263	2.501	0.105667	0.093	0.00366667	99.6323	22.9509	40.5254	6.78288	691.137	0.46879	1.81016	138.246	995.978	767.199	2.19464	0.0334055	-7.31184	2.81639	-70.3662	9.31304
1582B 2R3W 64/68	51.468	1.18767	13.746	12.964	6.289	0.209333	11.137	2.425	0.115	0.0946667	0.006	99.6417	23.7686	38.454	7.23905	661.467	0.478839	1.85611	139.852	1005.88	774.906	2.19822	0.0334589	-5.61097	2.90453	-76.7454	9.39619
1582B 3R1W 7/16	51.39	1.176	13.7627	12.9727	6.30367	0.210333	11.128	2.48433	0.115333	0.088	0.0123333	99.6433	22.856	43.111	6.61642	706.403	0.467385	1.96065	138.287	998.82	767.443	2.19104	0.0333993	-5.78243	3.03479	-73.3968	9.94078
1582B 2R2W 26/30																	0.504257	2.01423	146.494	1063.01	822.251	2.22572	0.033872	-5.91969	2.62568	-75.3406	10.0087	21.003	40.132	7.94	635.084
1582A 6R1W 22/28	51.604	1.21867	13.6477	13.3643	6.161	0.215667	10.9	2.50133	0.119	0.097	0.00366667	99.8323	19.1489	32.9294	7.46875	632.36	0.472294	1.94619	146.289	1013.13	878.099	2.27854	0.0347235	-6.71452	2.95917	-75.5436	7.84539
1582A 6R1W 115/123	51.537	1.23433	13.6443	13.3443	6.21633	0.211333	10.9673	2.529	0.121333	0.0926667	0.011	99.909	20.2567	41.3845	7.45169	638.733	0.475965	1.94224	145.407	990.998	860.325	2.34206	0.0357932	-3.17775	2.53436	-77.8988	9.45569	20.8306	38.6233	7.87	604.783
1582A 6R2W 43/45	51.6893	1.20533	13.6713	13.1343	6.212	0.208	10.9853	2.47167	0.116667	0.0946667	0	99.7887	22.2844	38.0052	6.95497	666.045	0.463232	2.69989	143.38	992.367	861.851	2.26961	0.0345258	-3.40824	2.47096	-81.3844	7.70473
1582A 7R2W 41/48	51.4423	1.18633	13.7387	12.7847	6.42233	0.213333	11.0887	2.514	0.111667	0.087	0.005	99.594	20.5597	36.5476	7.15578	621.084	0.444434	2.31707	138.139	978.455	828.688					-77.4367	10.6773
	Sc	V	Cr	Co	Ni	Cu	Zn	Ga	Rb	Sr	Y	Zr	Nb	Mo	Cd	Cs	Ba	La	Ce	Pr	Nd	Sm	Eu	Gd	Tb	Dy	Ho	Er	Tm	Yb	Lu	Hf	Ta	Pb	Th	U	Ti/Y	La/Sm	(La/Sm)CH	(La/Sm)PM	Sm/Yb	Ce/Pb	Nb/U	Ba/La	H2O/K2O	La/Nb	Th/Ta	Ba/Nb	Nb/Ta
1582B 5R2W 102/104	51.0441	407.617	37.4221	52.5111	46.6283	226.136	117.452	18.3596	2.94862	68.5633	33.2399	58.7278	2.76922	0.208177	0.199015	0.0368701	29.3118	2.78492	6.67858	1.06867	6.4162	2.46628	0.924331	3.88592	0.735526	5.02913	1.18932	3.48713	0.512487	3.68017	0.554061	1.69666	0.157376	0.322302	0.282158	0.0742722	210.602	1.1292	0.705152	0.70749	0.670155	20.7215	37.2848	10.5252	3.98573	1.00567	1.79289	10.5848	17.5962
1582B 3R1W 124/127	51.5165	400.123	58.128	51.3062	48.0225	217.388	120.884	18.4068	3.08287	69.4431	33.0389	59.1422	3.03667	0.242913	0.182873	0.032983	31.0829	3.00698	7.06217	1.11098	6.44005	2.50206	0.97662	3.94095	0.752321	5.28221	1.18967	3.32588	0.513224	3.67341	0.531749	1.69153	0.17952	0.332454	0.287489	0.0708412	209.283	1.2018	0.750492	0.75298	0.681129	21.2425	42.8659	10.3369	4.21796	0.990225	1.60143	10.2358	16.9155
1582B 3R1W 52/59	51.3448	410.367	55.3527	51.9758	48.1234	218.718	113.632	18.0523	2.95772	68.1745	32.7169	59.3937	2.96119	0.269432	0.168945	0.0237503	30.3968	2.91108	6.79604	1.04728	6.33169	2.51837	0.967747	3.81028	0.717517	5.21856	1.14823	3.32815	0.515757	3.42036	0.528707	1.67094	0.180412	0.304895	0.289414	0.069958	217.755	1.15594	0.721851	0.724244	0.736289	22.2897	42.3281	10.4417		0.983076	1.60419	10.265	16.4135
1582B 3R3W 24/25	50.6726	416.903	46.5843	52.5245	48.0092	221.389	116.842	18.6204	3.51132	69.1312	33.6989	62.3402	3.14292	0.1739	0.20722	0.0514843	32.158	3.07073	7.16103	1.07303	6.55504	2.48538	0.948906	3.89731	0.714747	5.19921	1.15479	3.49673	0.510617	3.44057	0.55422	1.6699	0.175553	0.356559	0.313575	0.0804811	215.856	1.23552	0.771547	0.774105	0.722374	20.0837	39.0517	10.4724	3.85771	0.97703	1.78621	10.2319	17.9029
1582B 4R1W 128/131	52.5257	421.692	55.0211	52.8715	49.9265	226.061	114.635	18.6539	5.11414	71.2973	33.7751	62.8756	3.12963	0.205974	0.254091	0.0907048	31.7903	3.00301	6.91478	1.03883	6.32784	2.4367	0.932889	3.67674	0.715569	5.10463	1.11641	3.35756	0.473349	3.41517	0.530171	1.58993	0.165453	0.327673	0.29918	0.0763274	213.594	1.23241	0.769605	0.772157	0.713493	21.1027	41.0027	10.5861	4.02115	0.959542	1.80824	10.1578	18.9155
1582B 4R2W 31/40	51.7232	406.897	57.3225	51.02	48.2795	211.501	105.226	17.9463	3.0374	68.3907	33.4781	62.4807	3.00291	0.225957	0.218931	0.0328673	31.8415	3.01541	6.94107	1.07458	6.22043	2.51262	0.907198	3.72292	0.717118	5.20924	1.1416	3.40962	0.505295	3.4696	0.533808	1.69359	0.177875	0.318836	0.300627	0.0706872	212.983	1.20011	0.749433	0.751918	0.724181	21.77	42.4817	10.5596	3.76756	1.00416	1.6901	10.6035	16.8822
1582B 4R2W 86/88	51.22	408.699	60.5226	51.0489	48.9674	210.165	103.416	17.6551	3.08636	67.9604	33.8701	62.6142	3.04514	0.272724	0.178846	0.0385424	31.0501	2.89899	6.95195	1.05048	6.33202	2.51271	0.965639	3.83357	0.702116	4.98489	1.17207	3.28247	0.49301	3.44015	0.525429	1.72577	0.171941	0.276411	0.316956	0.0778563	210.576	1.15373	0.720472	0.722861	0.730408	25.1507	39.1124	10.7107	3.87926	0.952005	1.8434	10.1966	17.7104
1582B 5R1W 73/79	50.3064	404.523	30.1858	50.4024	42.509	215.496	124.721	18.2154	2.91162	69.0209	33.4576	59.9528	2.78832	0.202552	0.21067	0.0404389	30.4335	2.94752	6.98389	1.10068	6.41369	2.66791	0.989346	4.07371	0.779156	5.46096	1.27792	3.62152	0.527905	3.83858	0.576305	1.78417	0.178303	0.320209	0.319237	0.081565	210.426	1.1048	0.689919	0.692207	0.695024	21.8104	34.1853	10.3251	4.12691	1.05709	1.79042	10.9146	15.6381
1582B 2R2W 120/124	51.4206	412.837	50.7808	50.8198	48.5549	216.2	111.369	18.142	2.93162	67.6867	32.8189	58.7149	2.94385	0.160871	0.148241	0.0244905	30.6076	2.87521	6.78288	1.0443	6.22306	2.51403	0.911531	3.86632	0.680438	4.97718	1.13633	3.23899	0.489644	3.35692	0.537989	1.6222	0.161506	0.295539	0.275072	0.0726421	214.338	1.14367	0.714188	0.716556	0.748909	22.9509	40.5254	10.6453	4.4365	0.976682	1.70317	10.3971	18.2275
1582B 2R3W 64/68	50.9537	411.831	51.4647	51.7276	48.9716	216.671	116.671	18.8715	3.21535	68.8588	33.2497	59.4665	2.96259	0.180278	0.121304	0.0389697	31.1969	2.9641	7.23905	1.01058	6.29926	2.60247	0.967234	3.71527	0.71833	5.10274	1.15527	3.35985	0.501491	3.49788	0.513033	1.67083	0.168813	0.304564	0.299715	0.0770423	214.085	1.13896	0.711246	0.713605	0.744013	23.7686	38.454	10.5249	4.16381	1.00051	1.77543	10.5303	17.5495
1582B 3R1W 7/16	52.059	407.492	74.0256	51.629	51.1456	219.371	107.214	18.0395	2.86336	66.1258	32.7737	58.7213	2.97731	0.189621	0.188252	0.0346308	29.6319	2.76024	6.61642	0.990236	6.1389	2.41042	0.873884	3.87709	0.714785	4.91015	1.1429	3.42351	0.498617	3.34375	0.510241	1.65544	0.180787	0.289482	0.270652	0.0690615	215.061	1.14513	0.715101	0.717473	0.720875	22.856	43.111	10.7352	4.05247	0.927093	1.49707	9.95257	16.4686
1582B 2R2W 26/30
1582A 6R1W 22/28	50.0795	412.605	39.117	50.458	44.7707	225.909	122.68	18.5953	3.27046	70.3104	34.3796	63.5157	3.06066	0.239024	0.16763	0.036826	34.1081	3.20596	7.46875	1.17435	6.9059	2.77372	1.03528	4.09056	0.794061	5.49087	1.27338	3.68959	0.543763	4.00424	0.5629	1.84966	0.185251	0.390035	0.341643	0.092946	212.453	1.15584	0.721787	0.724181	0.692695	19.1489	32.9294	10.6389	3.96886	1.04748	1.84422	11.144	16.5217
1582A 6R1W 115/123	51.0264	420.557	42.2055	51.3401	45.1035	221.99	122.065	18.8449	3.36901	70.1062	34.738	63.3595	3.15544	0.204214	0.198108	0.0369727	33.815	3.11698	7.45169	1.12751	6.87251	2.62735	0.991507	4.02069	0.753807	5.43625	1.27441	3.58319	0.554784	3.78436	0.583554	1.76455	0.182484	0.367864	0.314592	0.076247	212.965	1.18636	0.740849	0.743306	0.694266	20.2567	41.3845	10.8486	3.92278	0.987811	1.72394	10.7164	17.2916
1582A 6R2W 43/45	51.3094	419.05	46.5173	52.2622	46.131	222.987	111.651	18.2662	3.28847	67.8476	33.4423	61.738	2.9961	0.243847	0.179959	0.0343586	31.7716	2.95925	6.95497	1.04996	6.25501	2.43462	0.942468	3.64774	0.727571	5.23169	1.16657	3.29914	0.504145	3.38511	0.505739	1.66114	0.175977	0.3121	0.316327	0.0788341	216.018	1.21549	0.759038	0.761555	0.719216	22.2844	38.0052	10.7364	3.97056	0.987701	1.79755	10.6043	17.0255
1582A 7R2W 41/48	51.0119	413.526	61.332	51.9076	51.33	217.638	121.896	19.0817	3.18591	70.2309	33.2339	60.8842	2.9498	0.199568	0.163954	0.0352532	32.1569	3.06229	7.15578	1.12352	6.37848	2.61228	0.92436	3.89697	0.726735	5.4392	1.21017	3.5378	0.517719	3.69511	0.546202	1.7429	0.171007	0.34805	0.379899	0.080711	213.947	1.17227	0.732051	0.734478	0.706955	20.5597	36.5476	10.5009	3.98001	1.03814	2.22154	10.9014	17.2495
Note: 1, data from Yuji et al. (2026), all other data are from this work.
									3.25162				2.99478				31.4235																			0.0766315
[truncated: 1 more columns]
