# Supplementary material
Source: Research Square preprint supplement (doi:10.21203/rs.3.rs-10001941/v1)
Supplement: Supplementary file 2 [file 36329fb309a601f22b29a1f0.xlsx]

## Sheet: Sheet1
	Sample	Spot	3640 Peak Hight	Integral Absorbance (cm-1)	thickness (mm)	SiO2	Al2O3	TiO2	Cr2O3	FeO	NiO	MnO	MgO	CaO	Na2O	K2O	P	Total	换算系数	Si	Ti	Al	Cr	Fe	Ni	Mn	Mg	Ca	Na	K			Mg#	Al(IV)	Dwater(cpx/melt)			Water content(ppm)	Cwater (wt%)
3	1580A-67R4W-0/6-2	0/6-1-12-1	0.29	45.919	0.405	51.224	2.295	0.666	0.009	10.721	0	0.252	14.79	19.057	0.396	0		99.41	442.59	1.92638	0.0188333	0.101714	0.000267564	0.337138	0	0.00802616	0.829205	0.758062	0.0288717	0			71.0945	0.0736191	0.0113386			479.747	4.23108
5		0/6-1-13-1	0.3	51.314	0.405	51.695	2.161	0.594	0	8.225	0.009	0.213	15.834	20.016	0.314	0.007		99.068	445.313	1.9322	0.0166945	0.0951895	0	0.257065	0.000262474	0.00674253	0.882307	0.79134	0.0227532	0.000333742			77.438	0.0677969	0.0105602			536.112	5.07671
6		0/6-1-19-1	0.29	33.185	0.4235	51.863	2.1	0.408	0	8.264	0	0.196	16.419	19.334	0.288	0		98.872	445.512	1.93762	0.0114618	0.0924614	0	0.258169	0	0.00620163	0.914498	0.764037	0.0208599	0			77.9844	0.0623801	0.0104771			331.561	3.16464
7		0/6-1-6-1	0.24	36.153	0.455167	50.798	2.463	0.818	0.144	10.628	0.009	0.249	14.897	19.513	0.382	0		99.901	443.685	1.90564	0.0230745	0.10889	0.00427045	0.333388	0.000263437	0.00791103	0.833142	0.774285	0.0277822	0			71.4205	0.0943557	0.012766			336.085	2.63266
8		0/6-1-6-2	0.24	27.78	0.455167	51.198	2.498	0.599	0	9.286	0	0.23	15.552	19.356	0.278	0		98.997	443.474	1.92156	0.0169049	0.11049	0	0.29143	0	0.00731086	0.870188	0.76842	0.0202281	0			74.9117	0.0784366	0.0115788			258.248	2.23036
9		0/6-1-6-3	0.31	47.659	0.455167	51.75	2.389	0.485	0.261	8.146	0	0.138	15.882	20.095	0.35	0		99.496	447.279	1.92576	0.0135711	0.10477	0.007678	0.253477	0	0.0043492	0.881092	0.790972	0.0252504	0			77.6587	0.0742424	0.0110161			443.047	4.0218
10		0/6-1-6-4	0.44	42.234	0.455167	51.595	2.258	0.531	0.047	8.384	0	0.193	15.973	19.683	0.25	0		98.914	444.829	1.93056	0.0149401	0.0995705	0.00139024	0.26232	0	0.00611608	0.891021	0.779022	0.0181353	0			77.2557	0.0694351	0.0108056			392.615	3.63345
11		0/6-1-6-5	0.32	40.487	0.455167	51.086	2.493	0.649	0.006	9.649	0.033	0.209	15.263	19.536	0.334	0		99.258	443.411	1.91763	0.0183186	0.110285	0.000178046	0.302865	0.000966533	0.00664429	0.854139	0.775677	0.0243063	0			73.8233	0.0823672	0.0117925			376.374	3.19164
12		0/6-1-6-6	0.23	31.593	0.455167	51.135	1.731	0.638	0.023	13.489	0.017	0.419	14.031	17.787	0.311	0		99.581	438.967	1.9389	0.0181904	0.0773508	0.000689417	0.427682	0.000502951	0.0134552	0.793142	0.713382	0.0228616	0			64.9678	0.0610975	0.01093			293.694	2.68706
13		0/6-1-7-1	0.44	50.43	0.448	51.62	2.273	0.609	0.04	8.388	0.006	0.187	15.704	19.869	0.298	0		98.994	444.921	1.9311	0.0171312	0.100211	0.00118294	0.262391	0.000175137	0.00592471	0.875834	0.786221	0.0216128	0			76.9474	0.0688998	0.0106908			476.306	4.45529
14		0/6-2-10-1	0.16	20.888	0.406833	50.19	2.19	0.763	0.037	12.742	0	0.355	14.92	17.609	0.428	0		99.234	438.085	1.9069	0.0217981	0.0980586	0.0011113	0.404811	0	0.011423	0.845094	0.707665	0.0315256	0			67.6127	0.0930965	0.0135342			217.248	1.60518
15		0/6-2-10-2	0.2	29.758	0.406833	51.078	2.017	0.657	0	11.19	0	0.32	14.845	18.928	0.379	0		99.414	441.395	1.92609	0.0186291	0.0896351	0	0.352838	0	0.0102195	0.83454	0.754968	0.027707	0			70.2843	0.0739117	0.0113954			309.501	2.71601
16		0/6-2-10-3	0.18	22.748	0.406833	51.416	2.594	0.73	0.017	9.047	0.008	0.194	15.744	19.527	0.36	0		99.637	446.658	1.91599	0.0204551	0.113919	0.000500795	0.281905	0.000232608	0.00612259	0.874651	0.769683	0.0260079	0			75.6255	0.0840099	0.0119908			236.593	1.97313
17		0/6-2-10-4	0.16	28.497	0.406833	50.716	2.569	0.781	0.128	9.738	0.025	0.221	15.236	19.36	0.384	0		99.158	442.4	1.90809	0.0220948	0.113907	0.00380699	0.306357	0.000733895	0.00704184	0.854576	0.770445	0.0280088	0			73.6111	0.0919052	0.0126126			296.386	2.34993
18		0/6-2-10-5	0.2	32.802	0.406833	50.703	2.179	0.791	0.039	11.419	0	0.277	14.619	18.764	0.374	0		99.165	439.791	1.91892	0.0225104	0.0971876	0.00116682	0.361372	0	0.00887855	0.824833	0.751157	0.0274412	0			69.5354	0.0810787	0.0119845			341.161	2.84669
19		0/6-2-10-6	0.14	32.8	0.406833	50.884	1.972	0.675	0.039	11.259	0.011	0.313	14.876	18.879	0.346	0		99.254	440.363	1.92327	0.0191843	0.0878408	0.00116531	0.355846	0.000324408	0.0100194	0.838244	0.754779	0.0253538	0			70.1994	0.0767289	0.0116082			341.14	2.93878
20		0/6-2-11-1	0.24	46.925	0.399667	51.755	2.34	0.703	0.065	12.134	0	0.337	14.807	18.129	0.469	0		100.739	447.081	1.9268	0.0196799	0.102667	0.00191299	0.377738	0	0.0106256	0.821818	0.713903	0.0338505	0			68.5102	0.0732025	0.0118185			496.8	4.20357
22		0/6-2-11-3	0.24	30.601	0.399667	51.005	2.459	0.814	0	10.955	0.031	0.268	14.516	19.511	0.409	0		99.968	443.665	1.91349	0.0229627	0.108718	0	0.343661	0.000907435	0.00851507	0.81187	0.77424	0.0297472	0			70.2595	0.0865051	0.0121314			323.976	2.67055
23		0/6-2-11-4	0.24	39.946	0.399667	50.973	2.02	0.716	0.023	12.585	0.015	0.354	14.607	17.646	0.329	0		99.268	439.569	1.93012	0.0203863	0.0901415	0.000688474	0.398474	0.000443173	0.0113523	0.824573	0.706759	0.0241517	0			67.4196	0.069884	0.0116493			422.912	3.63038
25		0/6-2-12-2	0.28	30.996	0.410833	50.955	1.864	0.626	0.023	11.419	0.011	0.299	14.79	18.771	0.369	0.004		99.131	439.701	1.92886	0.0178185	0.0831551	0.000688267	0.361447	0.000324896	0.00958568	0.834653	0.751591	0.0270799	0.000193144			69.7812	0.0711447	0.0112302			319.238	2.84268
26		0/6-2-12-3	0.28	28.156	0.410833	50.444	2.691	0.891	0	11.502	0	0.266	14.81	18.279	0.46	0		99.343	440.9	1.90432	0.0252924	0.119722	0	0.363083	0	0.00850452	0.833507	0.7299	0.0336663	0			69.6569	0.0956837	0.013461			289.988	2.15428
30		0/6-2-13-3	0.34	63.448	0.423167	52.035	2.187	0.596	0.039	8.776	0.007	0.178	16.208	19.484	0.336	0		99.846	448.668	1.93037	0.0166255	0.0956145	0.00114374	0.272235	0.00020262	0.00559247	0.896395	0.764548	0.0241653	0			76.7047	0.0696301	0.010977			634.427	5.7796
31		0/6-2-13-4	0.24	46.834	0.423167	51.519	2.256	0.684	0.001	10.05	0.017	0.176	15.667	19.415	0.342	0		100.127	446.931	1.91865	0.0191544	0.0990144	2.94405e-05	0.312967	0.000493989	0.00555112	0.869841	0.7648	0.0246924	0			73.5403	0.0813466	0.0118427			468.301	3.95436
32		0/6-2-14-1	0.15	25.467	0.440333	50.816	1.638	0.638	0	13.026	0	0.388	14.64	17.48	0.299	0		98.925	437.056	1.93523	0.0182699	0.0735151	0	0.414808	0	0.0125142	0.831187	0.704135	0.0220756	0			66.7087	0.0647671	0.0112978			244.721	2.1661
33		0/6-2-14-2	0.17	26.097	0.440333	51.02	1.834	0.658	0.01	11.827	0.005	0.315	14.793	18.273	0.308	0		99.043	439.337	1.93291	0.0187448	0.0818844	0.000299494	0.374671	0.000147802	0.010107	0.835513	0.732257	0.022622	0			69.0402	0.0670865	0.0111513			250.775	2.24883
34		0/6-2-14-3	0.17	26.096	0.440333	51.121	1.82	0.622	0.01	11.793	0	0.319	14.78	18.284	0.334	0		99.083	439.647	1.93537	0.0177068	0.0812021	0.000299283	0.37333	0	0.0102281	0.83419	0.732181	0.0245144	0			69.0829	0.064626	0.0109753			250.765	2.28482
36		0/6-2-14-5	0.32	48.766	0.440333	50.635	2.429	0.754	0	10.57	0.04	0.215	14.645	19.6	0.393	0		99.281	440.972	1.91122	0.0214	0.108048	0	0.333609	0.00117804	0.00687284	0.824088	0.782522	0.0287581	0			71.1834	0.0887835	0.0122109			468.609	3.83764
38		0/6-2-15-2	0.34	47.342	0.435333	51.109	2.57	0.6	0.047	8.265	0	0.196	15.94	20.206	0.354	0		99.287	445.379	1.91002	0.0168607	0.113189	0.00138853	0.258277	0	0.00620347	0.888083	0.798734	0.0256479	0			77.4698	0.0899816	0.0121084			460.15	3.80025
39		0/6-2-5-1	0.34	52.033	0.397	52.1	2.455	0.591	0.063	7.893	0.007	0.19	15.965	20.121	0.329	0		99.714	449.25	1.93028	0.0164646	0.107192	0.00184518	0.244527	0.000202357	0.00596175	0.881811	0.78852	0.0236312	0			78.2901	0.0697237	0.0107235			554.579	5.17162
40		0/6-2-5-2	0.36	56.407	0.397	52.074	2.227	0.541	0.036	8.37	0.027	0.176	16.186	20.028	0.319	0		99.984	449.418	1.92859	0.0150661	0.0972008	0.00105399	0.259208	0.00078023	0.00552041	0.893684	0.784583	0.0229044	0			77.5167	0.0714074	0.0108843			601.198	5.52354
42		0/6-2-7-1	0.3	45.185	0.392167	51.233	1.883	0.649	0.118	11.111	0	0.339	15.274	18.528	0.348	0.001		99.484	442.318	1.9279	0.0183638	0.0835056	0.00351021	0.349616	0	0.0108037	0.856866	0.737472	0.0253877	4.80003e-05			71.0219	0.0720976	0.0114606			487.527	4.25393
45		0/6-2-9-1	0.3	30.194	0.404167	51.627	1.997	0.593	0.02	9.243	0.015	0.242	16.347	18.509	0.293	0		98.886	444.21	1.93445	0.0167078	0.088184	0.000592418	0.289599	0.000438543	0.00767955	0.913155	0.733578	0.0212842	0			75.922	0.0655455	0.0110256			316.108	2.86702
46		0/6-2-9-2	0.38	47.245	0.404167	50.877	1.696	0.759	0	14.116	0.049	0.44	13.968	17.282	0.296	0		99.483	437.565	1.9353	0.0217096	0.0760298	0	0.448996	0.00145433	0.0141749	0.792112	0.69535	0.0218287	0			63.823	0.0646963	0.0113922			494.619	4.34172
49		0/6-3-1	0.04	3.9649	0.103523	51.386	2.035	0.804	0.024	12.203	0.005	0.32	13.606	18.592	0.362	0		99.337	440.077	1.94351	0.0228655	0.090706	0.000717578	0.385932	0.000147554	0.0102501	0.767179	0.743788	0.0265435	0			66.5312	0.0564923	0.0102899			162.058	1.57492
53		0/6-3-5	0.07	7.1134	0.103523	51.893	2.41	0.804	0.012	11.005	0.007	0.205	13.859	18.829	0.341	0		99.365	443.339	1.94824	0.0226973	0.106631	0.000356149	0.345484	0.000205056	0.00651819	0.775695	0.747727	0.0248197	0			69.1857	0.0517569	0.00993882			290.748	2.92538
54		0/6-3-6	0.05	4.806	0.103523	51.3	2.56	0.676	0.491	8.486	0.05	0.2	14.847	19.997	0.343	0		98.95	443.627	1.92473	0.0190714	0.113194	0.014563	0.266231	0.00146373	0.00635508	0.830455	0.793595	0.0249491	0			75.724	0.0752703	0.0110609			196.437	1.77596
57	1580A-68R4W-18/23-3	18/23-1-10-2	0.22	27.48	0.303833	51.509	2.628	0.405	0.414	6.124	0.02	0.127	16.902	20.968	0.321	0		99.418	449.346	1.90797	0.0112805	0.114722	0.0121229	0.189683	0.000578041	0.00398412	0.933367	0.821539	0.0230517	0			83.11	0.0920257	0.0119937			382.698	3.19082
62		18/23-1-11-3	0.24	30.906	0.2805	50.802	3.333	0.56	0.526	6.36	0.006	0.13	16.438	20.776	0.311	0.003		99.245	447.909	1.88782	0.0156477	0.145964	0.0154519	0.197625	0.000173969	0.00409131	0.910656	0.816628	0.0224052	0.000142204			82.1684	0.112176	0.0137395			466.214	3.39325
63		18/23-1-1-2	0.23	22.481	0.255833	52.138	2.364	0.411	0.347	6.899	0	0.159	17.104	20.59	0.307	0.002		100.321	452.853	1.91632	0.0113589	0.102398	0.0100823	0.212032	0	0.00494935	0.937207	0.80048	0.0218756	9.37674e-05			81.5502	0.0836841	0.0116025			371.821	3.20466
65		18/23-1-15-1	0.16	16.369	0.244	50.969	2.491	0.591	0	8.619	0	0.133	15.802	20.348	0.331	0		99.284	444.485	1.90862	0.0166411	0.10993	0	0.269881	0	0.00421796	0.882164	0.805964	0.0240297	0			76.5737	0.0913837	0.0121313			283.862	2.33992
67		18/23-1-16-1	0.28	44.464	0.253833	51.358	2.816	0.409	0.523	6.5	0.057	0.155	16.917	21.119	0.236	0		100.09	451.105	1.89496	0.0113475	0.122449	0.0152549	0.200543	0.00164099	0.00484353	0.930551	0.824227	0.0168816	0			82.27	0.10504	0.0130174			741.199	5.69391
68		18/23-1-16-2	0.26	38.589	0.253833	51.711	2.44	0.47	0.264	6.458	0.063	0.128	16.629	20.88	0.271	0.003		99.317	448.673	1.91833	0.0131106	0.106674	0.00774213	0.200328	0.00182356	0.00402151	0.919669	0.819318	0.0194903	0.000141962			82.1135	0.0816703	0.0112379			643.265	5.72406
71		18/23-1-18-1	0.24	33.758	0.266333	50.856	3.078	0.474	0.471	6.829	0.041	0.105	16.752	20.192	0.265	0		99.063	446.957	1.89385	0.0132729	0.135084	0.0138657	0.21265	0.00119132	0.00331156	0.930028	0.795363	0.0191319	0			81.3902	0.106145	0.0134952			536.323	3.97416
72		18/23-1-2-1	0.14	24.65	0.257667	50.606	2.56	0.812	0.017	10.769	0	0.237	15.092	19.4	0.374	0		99.867	443.381	1.89974	0.0229209	0.113256	0.000504496	0.338042	0	0.00753494	0.844626	0.770329	0.027219	0			71.417	0.100257	0.0133178			404.794	3.0395
73		18/23-1-2-2	0.22	25.158	0.257667	51.641	2.533	0.489	0.082	7.314	0.021	0.183	16.65	20.788	0.3	0		100.001	450.131	1.90953	0.0135964	0.110382	0.00239696	0.226146	0.000605884	0.00573087	0.917847	0.813065	0.021506	0			80.2319	0.0904735	0.0119744			413.136	3.45017
74		18/23-1-2-3	0.23	24.867	0.257667	50.979	2.413	0.737	0.047	9.978	0	0.217	15.537	19.91	0.384	0		100.202	446.017	1.90244	0.0206809	0.106122	0.00138654	0.311362	0	0.00685831	0.864392	0.785908	0.0277817	0			73.5181	0.0975633	0.0128843			408.357	3.16942
75		18/23-1-3-1	0.19	17.508	0.240667	50.951	2.475	0.695	0.051	9.871	0.05	0.23	15.443	19.825	0.349	0		99.94	445.158	1.90506	0.0195399	0.109059	0.00150745	0.308617	0.0014587	0.0072832	0.860819	0.784062	0.0252982	0			73.6098	0.0949423	0.0126901			307.819	2.42567
78		18/23-1-4-1	0.26	31.595	0.253	51.91	2.11	0.349	1.034	5.818	0	0.147	16.765	20.75	0.381	0		99.264	449.077	1.92398	0.00972653	0.0921641	0.0302961	0.180313	0	0.00461429	0.926356	0.813484	0.0273768	0			83.7067	0.0760211	0.0108961			528.412	4.84954
79		18/23-1-4-2	0.22	35.312	0.253	51.794	2.348	0.525	0.134	7.043	0.041	0.17	16.571	20.726	0.376	0		99.728	449.472	1.91799	0.0146188	0.10247	0.00392274	0.218086	0.00118465	0.00533158	0.914832	0.81183	0.0269938	0			80.75	0.0820055	0.0113471			590.577	5.20466
80		18/23-1-6-1	0.2	25.829	0.2645	51.915	2.641	0.479	0.26	7.136	0.032	0.146	16.606	20.794	0.288	0		100.297	452.052	1.9115	0.0132617	0.114599	0.00756782	0.219705	0.000919328	0.00455274	0.911531	0.809843	0.0205581	0			80.5783	0.0885003	0.0118599			413.197	3.48398
83		18/23-1-7-1	0.22	21.612	0.2695	52.552	2.065	0.418	0.402	6.422	0.038	0.114	17.564	19.837	0.196	0.002		99.61	452.13	1.93462	0.0115709	0.0895895	0.011699	0.197688	0.00109151	0.00355427	0.963951	0.772439	0.0139885	9.39173e-05			82.982	0.0653785	0.0105939			339.321	3.20299
85		18/23-1-9-1	0.22	20.346	0.269	51.489	2.497	0.483	0.47	6.254	0.02	0.094	16.771	20.617	0.329	0		99.024	447.763	1.91398	0.0135006	0.109388	0.0138114	0.194394	0.000580085	0.0029593	0.929407	0.810642	0.0237097	0			82.7021	0.0860232	0.0116612			320.038	2.74448
86		18/23-1-9-2	0.22	18.139	0.269	51.771	2.491	0.467	0.268	6.574	0.053	0.124	16.92	20.954	0.279	0.001		99.902	450.936	1.91092	0.0129615	0.108358	0.00781999	0.202903	0.00152641	0.00387629	0.931066	0.818095	0.0199649	4.7083e-05			82.1068	0.0890828	0.0118071			285.323	2.41654
88		18/23-2-1-1	0.2	26.093	0.286833	51.265	3.035	0.548	0.378	6.789	0.047	0.167	16.365	20.177	0.384	0		99.155	447.759	1.90567	0.0153176	0.132958	0.011108	0.211025	0.00136321	0.00525752	0.906915	0.793349	0.0276736	0			81.1237	0.0943335	0.0125231			384.919	3.07367
89		18/23-2-11-2	0.31	30.266	0.3295	51.507	2.465	0.581	0.068	7.692	0.024	0.148	16.015	20.652	0.379	0		99.531	447.375	1.9163	0.0162539	0.10808	0.00199997	0.239299	0.000696705	0.00466336	0.88828	0.812722	0.0273367	0			78.7776	0.0836957	0.0114622			388.664	3.39083
90		18/23-2-12-1	0.19	33.449	0.302667	51.758	2.552	0.518	0.22	6.765	0	0.132	16.527	20.843	0.311	0.003		99.629	449.699	1.91569	0.0144165	0.111316	0.00643705	0.209372	0	0.00413772	0.911941	0.815999	0.022316	0.000141637			81.328	0.0843093	0.0114704			467.621	4.07677
91		18/23-2-12-2	0.2	39.45	0.302667	51.556	3.339	0.545	0.476	6.705	0	0.158	16.164	20.788	0.28	0		100.011	451.561	1.90035	0.0151054	0.145044	0.01387	0.20666	0	0.0049323	0.888234	0.81049	0.0200087	0			81.1251	0.0996539	0.0127434			551.515	4.32784
92		18/23-2-12-3	0.23	35.344	0.302667	50.571	2.215	0.719	0	10.499	0	0.208	14.94	19.373	0.386	0		98.911	439.68	1.91441	0.0204666	0.0988182	0	0.332341	0	0.00666861	0.843157	0.775732	0.0283288	0			71.7276	0.0855915	0.0120416			494.113	4.10338
94		18/23-2-15-1	0.34	46.222	0.310833	51.768	2.229	0.505	0.097	8.022	0.054	0.172	16.149	20.503	0.415	0		99.914	448.539	1.92102	0.0140911	0.0974787	0.00284549	0.248918	0.00156352	0.00540551	0.893388	0.804764	0.0298556	0			78.2092	0.0789837	0.0112053			629.211	5.61531
95		18/23-2-15-2	0.26	36.789	0.310833	51.802	2.33	0.45	0.11	7.434	0.024	0.149	16.361	20.628	0.345	0		99.633	448.614	1.92196	0.0125543	0.101879	0.00322631	0.230634	0.000694781	0.00468191	0.904966	0.809536	0.0248156	0			79.6906	0.0780405	0.0110838			500.801	4.51833
96		18/23-2-16-1	0.17	17.589	0.300167	50.713	1.903	0.912	0.036	12.316	0	0.325	14.493	18.081	0.408	0		99.187	438.722	1.92398	0.0260171	0.0850843	0.00107969	0.390709	0	0.0104425	0.819716	0.725579	0.0300088	0			67.7214	0.0760233	0.0118975			247.944	2.084
97		18/23-2-16-3	0.23	42.933	0.300167	50.359	2.57	0.764	0.036	10.08	0.015	0.234	15.342	19.267	0.405	0		99.072	441.071	1.90037	0.0216789	0.114294	0.00107394	0.318072	0.000441664	0.00747852	0.863114	0.769054	0.0296295	0			73.0718	0.0996292	0.0132804			605.207	4.55713
103		18/23-2-2-5	0.28	40.617	0.314167	51.727	2.738	0.39	0.599	5.99	0.037	0.121	16.488	20.761	0.622	0		99.473	449.835	1.91397	0.0108509	0.119394	0.0175211	0.185331	0.00106821	0.00379176	0.909515	0.812544	0.0446186	0			83.0724	0.0860327	0.0116397			547.045	4.69981
104		18/23-2-2-6	0.13	36.125	0.314167	51.887	2.561	0.438	0.667	5.951	0.053	0.116	16.588	20.819	0.516	0		99.596	450.512	1.917	0.0121681	0.111507	0.0194808	0.183847	0.00152784	0.00362962	0.913657	0.81359	0.0369592	0			83.2486	0.0829975	0.0114004			486.545	4.26778
105		18/23-2-3-1	0.3	68.322	0.316333	50.584	2.477	0.659	0.022	9.051	0	0.201	15.444	19.985	0.568	0		98.991	441.877	1.90538	0.0186654	0.109958	0.000655101	0.285081	0	0.00641215	0.867269	0.79626	0.0414788	0			75.2609	0.0946172	0.0125097
106		18/23-2-3-2	0.28	55.834	0.316333	52.177	2.51	0.423	0.429	6.477	0.047	0.128	16.522	21.046	0.459	0		100.218	452.509	1.91921	0.0116995	0.108805	0.0124743	0.199214	0.0013489	0.00398742	0.906005	0.818831	0.0327314	0			81.9751	0.0807911	0.0111793			746.842	6.68056
107		18/23-2-5-1	0.34	54.338	0.310667	51.949	2.419	0.445	0.537	6.187	0	0.103	16.617	20.91	0.338	0		99.505	450.075	1.92116	0.0123745	0.105427	0.0156991	0.191324	0	0.00322598	0.916142	0.817939	0.0242332	0			82.7242	0.0788438	0.0110486			740.089	6.69851
109		18/23-2-5-3	0.32	49.984	0.310667	51.437	2.783	0.435	0.518	6.288	0	0.153	16.262	20.859	0.376	0		99.111	447.749	1.9121	0.0121593	0.121921	0.0152223	0.195457	0	0.00481688	0.901227	0.820182	0.0270976	0			82.1775	0.087898	0.0116921			680.787	5.82265
110		18/23-2-6-3	0.25	30.522	0.328	50.323	2.204	0.844	0.049	12.297	0.03	0.375	14.645	17.717	0.402	0.004		98.89	437.47	1.91465	0.0241461	0.0988243	0.00147379	0.391223	0.0008906	0.0120835	0.830685	0.713007	0.0296522	0.000194129			67.9826	0.0853531	0.0128013			393.744	3.07582
111		18/23-2-7-4	0.15	26.113	0.339167	51.487	2.92	0.518	0.489	6.279	0.041	0.099	16.106	20.822	0.322	0		99.083	447.99	1.91293	0.0144715	0.127854	0.0143624	0.195072	0.00118857	0.00311513	0.892102	0.818288	0.0231935	0			82.0569	0.087068	0.0116512		4.22622	325.776	2.79607
112		18/23-3-22	0.07	8.5917	0.0839091	53.408	2.531	0.338	0.263	6.561	0.055	0.156	15.699	20.927	0.218	0		100.156	454.413	1.95625	0.00930934	0.109255	0.00761537	0.200952	0.00157189	0.0048393	0.857266	0.810788	0.0154805	0			81.0104	0.0437459	0.00885795			433.257	4.89116
114		18/23-3-24	0.08	9.0498	0.0839091	53.509	2.353	0.318	0.139	7.019	0.004	0.146	15.504	20.713	0.239	0		99.944	453.152	1.96541	0.00878287	0.101854	0.00403606	0.215578	0.000114637	0.00454169	0.848975	0.804731	0.0170189	0			79.7494	0.034591	0.00839693			456.357	5.43481
115		18/23-3-25	0.055	5.1082	0.0839091	53.801	2.565	0.385	0.438	6.22	0.028	0.16	16.046	20.915	0.281	0		100.839	458.261	1.9541	0.0105148	0.109793	0.0125761	0.188908	0.000793514	0.00492171	0.868858	0.80352	0.0197866	0			82.1408	0.045897	0.0090482			257.593	2.8469
116		18/23-3-26	0.07	7.825	0.0839091	52.257	2.803	0.354	0.771	6.414	0.007	0.163	15.775	20.754	0.264	0		99.562	450.595	1.93032	0.00983265	0.122022	0.0225141	0.198114	0.000201754	0.0050993	0.868717	0.8109	0.0189059	0			81.4296	0.0696831	0.0104834			394.594	3.76398
117		18/23-3-27	0.075	7.865	0.0839091	53.082	3.231	0.379	1.007	6.222	0.035	0.153	15.248	20.657	0.256	0		100.27	455.254	1.94072	0.0104193	0.139214	0.0291046	0.190217	0.000998444	0.00473747	0.831102	0.79885	0.0181453	0			81.3753	0.0592757	0.00991647			396.611	3.99952
158	1580A-54R1W-60/66-1	60/66-1-17-1		13.668	0.167667	51.118	3.438	0.612	0.592	6.476	0.044	0.161	16.156	20.805	0.296	0		99.698	449.909	1.89112	0.0170247	0.149893	0.0173134	0.200334	0.0012701	0.0050444	0.891054	0.814131	0.0212298	0			81.6441	0.10888	0.0134819			344.932	2.55849
160		60/66-1-21-1		23.24	0.153167	51.11	3.404	0.69	0.291	7.294	0.051	0.196	16.603	19.892	0.3	0		99.831	450.174	1.88971	0.0191832	0.148323	0.00850548	0.225506	0.00147129	0.0061374	0.915168	0.777946	0.021504	0			80.2305	0.110289	0.0141073			642.018	4.55097
163		60/66-1-4-1		6.756	0.136	52.891	2.149	0.407	0.865	6.055	0.03	0.173	17.524	20.392	0.361	0		100.847	457.094	1.92596	0.011144	0.0922213	0.0248999	0.184366	0.000852364	0.00533518	0.951311	0.785427	0.0254847	0			83.766	0.0740442	0.0110631			210.197	1.89998
164		60/66-1-4-2		14.344	0.136	52.482	2.243	0.309	0.691	5.749	0	0.147	17.296	20.85	0.3	0		100.067	453.723	1.92526	0.00852356	0.0969703	0.0200389	0.17635	0	0.00456705	0.94591	0.809034	0.0213358	0			84.2862	0.0747386	0.0108539			446.279	4.1117
166		60/66-1-7-1	0.13	18.127	0.189	50.985	3.483	0.675	0.874	6.326	0	0.147	16.338	21.061	0.296	0.002		100.187	451.623	1.87904	0.018706	0.151278	0.0254637	0.194951	0	0.00458828	0.897671	0.821021	0.0211492	9.40227e-05			82.1575	0.12096	0.014483			405.825	2.80209
169		60/66-2-1-2		35.216	0.159667	52.421	2.21	0.386	0.507	6.116	0	0.207	16.955	20.622	0.272	0		99.696	451.768	1.93135	0.0106936	0.0959571	0.0147666	0.188419	0	0.00645898	0.931274	0.80365	0.0194282	0			83.1722	0.0686538	0.0104893
171		60/66-2-1-5	0.1	15.64	0.159667	52.29	2.019	0.419	0.69	5.984	0.001	0.193	17.312	20.397	0.277	0		99.582	451.328	1.9284	0.0116192	0.0877494	0.0201161	0.184532	2.87751e-05	0.00602801	0.951809	0.795656	0.0198046	0			83.7608	0.071604	0.0107782			414.474	3.84549
172		60/66-2-16-1	0.21	30.312	0.1635	50.658	3.583	0.583	0.942	6.634	0.04	0.139	16.39	19.998	0.282	0.007		99.256	447.949	1.8823	0.016289	0.156898	0.02767	0.20612	0.00115969	0.00437417	0.907916	0.785977	0.0203142	0.000331779			81.4979	0.117696	0.0146846			784.462	5.34206
173		60/66-2-3-1	0.12	22.958	0.169	52.018	2.128	0.379	0.498	6.075	0.007	0.126	17.221	20.266	0.283	0		99.001	448.872	1.92886	0.0105674	0.0929927	0.014598	0.188363	0.000202528	0.00395691	0.951986	0.794871	0.0203443	0			83.482	0.0711392	0.0107541			574.807	5.345
175		60/66-2-3-3	0.11	19.63	0.169	51.107	3.314	0.709	0.363	6.717	0	0.162	16.348	20.589	0.295	0.001		99.605	449.509	1.8924	0.0197406	0.144615	0.0106256	0.207975	0	0.00508026	0.902446	0.806397	0.0211769	4.72325e-05			81.2706	0.107603	0.0134742			491.483	3.64758
176		60/66-2-3-7	0.14	33.674	0.169	51.115	3.212	0.658	0.378	7.042	0	0.164	16.389	19.794	0.268	0.002		99.022	447.384	1.90168	0.0184077	0.14083	0.0111173	0.219073	0	0.0051674	0.909006	0.778941	0.01933	9.49136e-05			80.58	0.0983184	0.0130382			843.108	6.46644
178		60/66-2-6-3	0.15	31.585	0.172	51.061	3.235	0.736	0.151	7.554	0.01	0.201	16.073	20.077	0.267	0		99.365	447.6	1.89876	0.0205798	0.14177	0.00443888	0.234887	0.000290148	0.00633016	0.891049	0.789696	0.0192486	0			79.1385	0.101244	0.0131464			777.012	5.91045
191	1579D-63R1W-65/71-2	65/71-1-2-8	0.24	53.711	0.318	50.389	1.37	0.614	0.029	14.655	0	0.299	14.334	16.357	0.275	0		98.322	432.27	1.94022	0.0177773	0.0621678	0.000882732	0.47185	0	0.00975045	0.822824	0.666193	0.0205284	0			63.5545	0.0597824	0.0113606			714.679	6.29088
196		65/71-1-3-7	0.36	84.65	0.391167	51.356	2.573	0.419	0.24	6.75	0.027	0.14	16.4	20.471	0.267	0		98.643	445.513	1.91867	0.0117708	0.113287	0.00708823	0.210871	0.000787069	0.00442973	0.913437	0.808967	0.0193388	0			81.2444	0.0813259	0.0113295			915.672	8.08222
199		65/71-2-1-10	0.3	63.777	0.334833	51.464	1.8	0.526	0.079	9.806	0.022	0.258	15.714	19.217	0.329	0		99.215	443.196	1.93276	0.014854	0.0796667	0.0023454	0.307942	0.000644668	0.00820602	0.879804	0.763381	0.023954	0			74.0734	0.0672409	0.0108205			805.954	7.44842
201		65/71-2-1-15	0.26	47.495	0.334833	51.852	2.709	0.413	0.451	6.542	0	0.132	16.972	20.436	0.258	0.005		99.77	451.287	1.91242	0.0114538	0.117749	0.0131495	0.201758	0	0.00412316	0.933201	0.79725	0.0184478	0.000235232			82.2233	0.0875824	0.0119388			600.198	5.0273
203		65/71-2-1-17	0.21	39.634	0.334833	51.517	1.809	0.493	0.097	12.54	0	0.307	15.475	17.619	0.3	0.001		100.158	444.051	1.93102	0.0138953	0.0799108	0.00287425	0.393041	0	0.00974572	0.864754	0.698554	0.0218005	4.7813e-05			68.7516	0.0689772	0.0116762			500.858	4.28956
204		65/71-2-1-5	0.24	44.29	0.334833	51.739	2.835	0.393	0.712	6.834	0	0.158	16.357	20.493	0.288	0		99.809	450.489	1.91163	0.0109185	0.123444	0.0207961	0.211137	0	0.00494403	0.900978	0.80089	0.0206294	0			81.0148	0.088371	0.0119565			559.696	4.68109
211		65/71-2-2-3	0.26	51.025	0.283333	52.069	1.906	0.383	0.06	7.751	0.024	0.181	16.414	20.135	0.316	0		99.239	447.058	1.93859	0.0107223	0.0836294	0.00176593	0.241305	0.000697198	0.0057072	0.911056	0.792938	0.0228087	0			79.0599	0.0614133	0.0101148			762.009	7.53358
213		65/71-2-2-6	0.28	39.591	0.283333	51.718	2.586	0.423	0.378	6.594	0.011	0.163	16.572	20.68	0.307	0		99.432	449.153	1.91654	0.0117869	0.112937	0.0110735	0.204328	0.000318059	0.00511566	0.915536	0.810602	0.0220558	0			81.7542	0.083462	0.0114691			591.254	5.15519
217		65/71-2-3-2	0.3	52.34	0.3215	51.509	2.78	0.502	0.406	8.448	0.023	0.133	16.94	18.734	0.233	0		99.708	449.162	1.90875	0.0139879	0.121406	0.0118935	0.261772	0.000665019	0.00417405	0.935848	0.734309	0.0167391	0			78.1423	0.0912457	0.0130207			688.855	5.29044
218		65/71-2-3-3	0.26	48.763	0.3215	50.92	3.571	0.451	0.38	6.925	0	0.184	16.373	19.861	0.258	0		98.923	447.084	1.8957	0.0126253	0.156675	0.0111836	0.215578	0	0.00580146	0.908729	0.782103	0.0186213	0			80.8257	0.104301	0.0135124			641.777	4.74955
226		65/71-3-1-2	0.21	54.197	0.294	53.129	1.997	0.326	0.123	6.791	0.064	0.177	17.418	20.016	0.224	0		100.265	454.756	1.94457	0.00897206	0.0861389	0.00355887	0.20784	0.00182772	0.0054866	0.950417	0.774908	0.0158945	0			82.0558	0.0554331	0.00990622			780.015	7.87399
230		65/71-3-1-9	0.17	39.145	0.294	50.892	1.346	0.63	0.027	15.394	0	0.347	13.985	16.161	0.295	0		99.077	434.858	1.94792	0.018132	0.0607152	0.000816963	0.492694	0	0.0112484	0.798012	0.654293	0.0218903	0			61.8276	0.0520773	0.010935			563.383	5.15213
233		65/71-3-2-12	0.26	61.681	0.302167	50.437	1.641	0.77	0	17.374	0	0.519	12.368	16.426	0.374	0		99.909	433.586	1.93617	0.0222264	0.0742393	0	0.557697	0	0.0168734	0.707815	0.666974	0.027834	0			55.9311	0.0638253	0.011654			863.734	7.4115
244		65/71-3-3-4	0.3	49.272	0.332667	52.407	1.823	0.453	0.013	8.524	0.003	0.233	16.404	19.594	0.275	0		99.729	448.774	1.94371	0.0126335	0.0796818	0.000381155	0.264356	8.68166e-05	0.00731875	0.90702	0.768682	0.0197735	0			77.432	0.0562902	0.0100238			626.709	6.25223
249		65/71-3-3-9	0.34	73.456	0.332667	51.88	3.258	0.47	0.406	6.529	0.017	0.142	17.941	20.438	0.336	0		101.417	458.469	1.88348	0.0128304	0.139393	0.0116521	0.198203	0.000481558	0.00436604	0.971028	0.784838	0.0236487	0			83.0484	0.116523	0.0145897			934.314	6.40392
250		65/71-4-11	0.04	4.4157	0.0696818	56.601	1.875	0.295	0.635	7.951	0.036	0.2	14.716	19.192	0.33	0.001		101.832	464.324	2.02896	0.00795159	0.0792101	0.0179945	0.238327	0.00100691	0.00607181	0.786437	0.727698	0.0229336	4.57255e-05			76.7432
251		65/71-4-12	0.06	13.205	0.0696818	53.112	2.555	0.419	0.112	7.929	0.02	0.163	15.955	19.916	0.226	0.007		100.414	453.932	1.94748	0.0115525	0.110408	0.00324649	0.243109	0.000572201	0.00506181	0.87217	0.772437	0.0160656	0.000327406			78.202	0.0525248	0.00974476			801.852	8.22854
252		65/71-4-13	0.048	5.884	0.0696818	50.96	2.501	0.582	0.01	12.995	0.03	0.323	13.583	18.165	0.316	0		99.465	439.437	1.9302	0.016576	0.111639	0.000299426	0.411579	0.000886613	0.0103613	0.766998	0.727764	0.0232043	0			65.0783	0.0697972	0.0114007			357.296	3.13399
253		65/71-4-14	0.075	7.382	0.0696818	53.716	2.259	0.274	0.811	6.578	0.014	0.19	16.961	19.381	0.236	0		100.42	457.028	1.95628	0.00750346	0.0969559	0.0233488	0.20032	0.000397828	0.0058603	0.920882	0.746596	0.0166628	0			82.1334	0.0437184	0.00944352			448.26	4.74674
255		65/71-4-16	0.055	4.574	0.0696818	53.627	2.249	0.381	0.251	6.835	0.04	0.198	16.234	20.701	0.242	0		100.758	456.693	1.95447	0.0104413	0.0965974	0.00723163	0.208299	0.00113748	0.00611153	0.882057	0.798029	0.017099	0			80.8962	0.0455278	0.00907621			277.748	3.06018
120	1579D-63R1W-29/35	29/35-1-1-12	0.17	33.451	0.312167	51.664	2.573	0.471	0.304	6.825	0.037	0.151	16.696	20.552	0.267	0		99.54	449.335	1.91376	0.0131191	0.112323	0.00890204	0.2114	0.0010694	0.00473713	0.922013	0.805258	0.0191743	0			81.3484	0.0862396	0.0117406			453.417	3.86195
130		29/35-1-2-2	0.24	28.707	0.276667	52.322	1.829	0.358	0.299	6.925	0.028	0.183	17.681	19.724	0.228	0.001		99.578	450.647	1.93249	0.00994259	0.0796118	0.00873014	0.213873	0.000806921	0.00572431	0.973566	0.770567	0.0163259	4.71132e-05			81.9887	0.0675072	0.0107616			439.042	4.0797
147		29/35-2-2-4	0.24	45.943	0.306833	51.957	1.816	0.467	0.032	8.814	0.04	0.184	16.078	19.403	0.228	0		99.019	444.96	1.94354	0.0131356	0.0800563	0.000946272	0.275693	0.00116748	0.00582916	0.896616	0.767715	0.0165346	0			76.4829	0.0564596	0.0100445			633.566	6.30757
154		29/35-2-3-6	0.24	33.301	0.3005	52.163	2.304	0.365	0.266	6.483	0	0.137	16.671	20.766	0.245	0		99.4	449.785	1.93031	0.0101564	0.10048	0.0077815	0.200606	0	0.00429363	0.919712	0.81283	0.0175768	0			82.0938	0.0696857	0.0104634			468.908	4.48142
156		29/35-2-3-8	0.2	24.886	0.3005	51.66	3.148	0.412	0.626	6.315	0.004	0.111	16.888	19.999	0.287	0		99.45	450.802	1.90739	0.0114384	0.136977	0.0182715	0.194967	0.000115235	0.00347093	0.929582	0.781042	0.0205435	0			82.6626	0.0926131	0.0125372			350.417	2.79503
157		29/35-2-3-9	0.21	26.18	0.3005	51.688	3.021	0.416	0.335	6.712	0	0.116	16.754	19.835	0.304	0		99.181	449.322	1.91471	0.0115875	0.131884	0.0098101	0.207906	0	0.00363923	0.925243	0.777188	0.021832	0			81.6524	0.0852938	0.0120008			368.638	3.07177
