# Supplementary material
Source: Research Square preprint supplement (doi:10.21203/rs.3.rs-10001941/v1)
Supplement: Supplementary file 3 [file 5ae859a92fc650a76332175f.xlsx]

## Sheet: This study
Supplementary Datasets S2. The major and trace elemental concentrations for the U1579 and U1580 basaltic sample.
Site	U1580	U1580	U1580	U1580	U1579	U1579
Sample	1580A 48R5W 38/44	1580A 54R1W 60/66	1580A 67R4W 0/6	1580A 68R4W 18/23	1579D 63R1W 65/71	1579D 63R3W 29/35
SiO2	47.99	48.88	50.1	48.12	49.25	48.26
Al2O3	14.14	14.21	13.03	15.74	14.21	15.16
Fe2O3	12.21	11.61	12.44	10.6	12.21	11.15
MgO	9.53	8.21	7.52	7.44	7.47	7.63
CaO	8.93	10.43	11.29	12.89	12.57	12.07
Na2O	2.69	3.42	2.79	2.49	2.55	2.64
K2O	0.04	0.26	0.12	0.08	0.05	0.06
MnO	0.311	0.159	0.193	0.16	0.16	0.158
P2O5	0.105	0.16	0.145	0.091	0.1	0.103
TiO2	1.587	1.527	1.447	1.178	1.293	1.208
LOI	1.65037	1.33873	0.796813	0.671943	0.268953	1.45032
SUM	99.1834	100.205	99.8718	99.4609	100.132	99.8893
Mg#	63.4297	61.1113	57.3258	60.9337	57.6189	60.3281
Li	4.68	6.5	3.09	3.09	4.83	8.59
Be	0.515	0.578	0.433	0.301	0.318	0.316
Sc	37.7	37.3	47.2	41.5	46.3	42.2
V	214	185	205	182	230	214
Cr	269	292	51.4	340	289	239
Co	42	40	39.7	41.1	48.9	45.1
Ni	107	102	45.5	73.7	88.7	77.2
Cu	125	101	153	114	163	139
Zn	89.5	89.2	90.3	84	91.3	89.4
Rb	0.97	2.85	2.22	1.89	1.5	1.71
Sr	178	179	175	171	121	124
Y	31.2	33.3	32.9	22.7	30.5	27.4
Zr	109	145	116	82.2	111	99.5
Nb	5.08	6.83	5.91	3.49	3.22	2.98
Cd	0.067	0.075	0.08	0.055	0.069	0.071
In	0.014	0.018	0.019	0.012	0.017	0.014
Sn	0.735	0.897	0.346	0.459	0.357	0.596
Sb	0.074	0.346	1.84	0.058	0.008	0.012
Cs	0.026	0.042	0.032	0.025	0.011	0.015
Ba	19.9	28.4	41.7	24.3	15.4	16.1
La	5.46	6.92	5.56	3.46	3.41	3.13
Ce	14.8	19.4	15	9.58	9.93	8.93
Pr	2.13	2.8	2.22	1.39	1.52	1.35
Nd	11.2	14.3	11.6	7.48	8.35	7.37
Sm	3.61	4.37	3.82	2.49	2.96	2.64
Eu	1.36	1.64	1.51	1.03	1.17	1.1
Gd	4.32	5.19	4.72	3.12	3.86	3.41
Tb	0.769	0.882	0.825	0.538	0.688	0.61
Dy	5.11	5.81	5.38	3.61	4.79	4.16
Ho	1.12	1.23	1.17	0.778	1.05	0.93
Er	3.1	3.33	3.2	2.14	2.88	2.62
Tm	0.455	0.488	0.483	0.316	0.443	0.388
Yb	2.85	3.06	3.01	2.03	2.78	2.49
Lu	0.421	0.442	0.464	0.301	0.414	0.366
Hf	2.91	3.82	3.13	2.21	3	2.63
Ta	0.359	0.478	0.389	0.258	0.237	0.215
Pb	0.336	0.424	0.218	0.209	0.245	0.166
Th	0.432	0.63	0.42	0.222	0.214	0.19
U	0.154	0.222	0.173	0.1	0.109	0.097
La/Sm	1.51247	1.58352	1.4555	1.38956	1.15203	1.18561
Zr/Hf	37.457	37.9581	37.0607	37.1946	37	37.8327
Ce/Pb	44.0476	45.7547	68.8073	45.8373	40.5306	53.7952
Nb/U	32.987	30.7658	34.1618	34.9	29.5413	30.7216
La/Sm)pm	0.947625	0.992146	0.911932	0.870618	0.721795	0.742833
(Sm/Yb)PM	1.37586	1.55122	1.37851	1.33234	1.15654	1.15164

## Sheet: Ichiyama et al. 2026
Supplementary Datasets S2. The previously reported major and trace elemental concentrations for the U1579 and U1580 basaltic sample.	Whole rock major- and trace-element compositions for the drilled basaltic sample from U1580 and U1579.
Cruise	IODP 392 (Agulhas Plateau)
Hole	U1579D														U1580A
Core	60R	61R	61R	61R	62R	63R	63R	63R	64R	64R	65R	65R	65R		43R	45R	45R	46R	47R	47R	48R	48R	48R	48R	49R	50R	50R	50R	51R	51R	51R	52R	52R	52R	53R	53R	54R	55R	55R	56R	56R	58R	59R	59R	62R	63R	63R	63R	64R
Section	CC	3	4	7	3	1	3	3	2	2	4	4	5		CC	1	2	CC	2	2	1	4	6	6	3	1	2	4	1	2	2	1	2	3	1	3	3	3	5	1	4	2	1	2	1	2	5	6	2
Interval (cm)	18-23	18-23	77-79	35-40	111-113	65-77	19-21	29-41	0-5	121-123	20-25	112-117	4-15		7-11	40-42	72-77	4-10	42-54	54-56	70-75	8-20	40-52	72-74	10-12	15-27	11-13	47-52	70-80	6-8	61-66	4-9	120-132	3-5	59-64	97-99	7-9	0-5	3-5	57-59	80-92	0-5	145-147	70-82	39-41	16-18	4-16	37-48	73-75
Sill#/Lava	Sill#1	Sill#1	Sill#1	Sill#1	Sill#1	Sill#1	Sill#1	Sill#1	Sill#1	Sill#1	Sill#2	Sill#2	Sill#2		Sill#1	Sill#1	Sill#1	Sill#2	Sill#2	Sill#2	Sill#2	Sill#2	Sill#3	Sill#3	Sill#3	Sill#3	Sill#3	Sill#3	Sill#3	Sill#3	Sill#3	Sill#4	Sill#4	Sill#4	Sill#4	Sill#4	Sill#4	Sill#4	Sill#4	Sill#4	Sill#4	Sill#5	Sill#5	Sill#5	Sill#6	Sill#6	Sill#6	Sill#6	Sill#6
Lab.	ERI	ERI	ERI	ERI	ERI	AIST	ERI	AIST	ERI	ERI	AIST	ERI	AIST		ERI	ERI	ERI	ERI	AIST	ERI	ERI	AIST	AIST	ERI	ERI	AIST	ERI	ERI	AIST	ERI	ERI	ERI	AIST	ERI	ERI	ERI	ERI	ERI	ERI	ERI	AIST	ERI	ERI	AIST	ERI	ERI	AIST	AIST	ERI
XRF (wt%)
SiO2	46.707	47.156	48.53	46.294	48.266	48.737	48.696	48.679	45.98	48.442	46.623	42.062	46.068		46.419	48.19	47.912	45.21	48.608	49.238	49.011	47.005	46.65	46.952	49.149	49.467	50.838	48.75	48.741	49.039	46.825	46.734	48.371	48.684	47.331	48.471	48.27	47.276	47.97	48.339	49.38	44.315	48.962	48.567	47.626	48.381	48.571	49.051	48.772
TiO2	1.265	1.246	1.349	1.295	1.259	1.406	1.3	1.324	1.281	1.316	1.345	1.11	1.346		2.139	2.331	2.064	2.84	2.588	2.672	2.51	2.683	1.95	1.987	2.443	1.932	1.903	1.841	2.017	2.004	1.962	1.663	1.717	1.656	1.615	1.766	1.683	1.475	1.791	1.673	1.479	1.363	1.328	1.249	1.448	1.37	1.326	1.942	1.385
Al2O3	14.823	14.872	15.303	14.103	15.937	13.692	15.367	15.389	13.897	15.413	14.07	11.828	13.712		13.696	14.413	13.658	13.623	13.717	14.044	13.5	13.603	14.323	14.56	13.869	14.595	14.436	14.091	14.506	14.581	14.354	14.324	14.778	14.827	14.449	14.965	14.69	14.523	15.187	14.558	14.793	16.076	14.538	14.687	15.842	15.433	16.461	14.625	15.843
FeO*	9.077	8.925	10.4491	10.337	10.1433	10.9938	9.97005	9.95089	10.46	10.3346	8.941	9.934	9.57927		12.435	14.2417	11.723	14.245	13.2909	13.1077	12.326	13.5753	13.2694	13.7965	13.0215	11.0073	10.5875	10.713	11.1629	11.2865	11.724	10.732	10.623	10.4768	10.34	10.265	10.4244	10.112	10.8114	10.6174	9.72054	10.975	10.1759	10.2325	10.172	10.4174	9.83931	12.6386	9.80377
MnO	0.153	0.151	0.169	0.153	0.168	0.164	0.159	0.151	0.168	0.181	0.158	0.15	0.166		0.56	0.597	0.382	0.624	0.252	0.255	0.212	0.829	0.314	0.198	0.266	0.161	0.162	0.166	0.263	0.287	0.526	0.199	0.171	0.165	0.161	0.145	0.178	0.163	0.203	0.165	0.17	0.447	0.227	0.214	0.473	0.183	0.154	0.215	0.157
MgO	6.276	6.418	6.472	6.667	6.59	7.719	7.116	7.497	6.492	6.248	6.664	7.062	7.36		8.215	8.18	8.487	7.845	7.663	7.305	6.663	8.38	9.208	9.181	7.806	7.67	7.382	7.312	7.75	8.489	7.808	8.341	8.659	8.585	8.1	7.708	8.081	8.239	7.822	8.994	8.816	8.879	7.966	8.646	8.834	7.382	7.389	7.686	7.157
CaO	11.907	12.078	12.727	11.877	12.818	12.425	12.592	12.355	12.211	12.938	10.8	11.496	12.026		6.139	6.877	7.277	4.372	6.207	6.507	6.199	5.143	6.8	6.82	6.664	9.042	8.861	8.754	8.436	8.301	7.15	9.427	10.492	10.546	10.82	11.606	11.531	11.423	11.057	10.583	10.361	7.795	12.415	11.636	10.253	11.783	11.861	8.227	11.885
Na2O	2.086	2.12	2.318	2.195	2.202	2.213	2.233	2.294	2.143	2.198	2.282	1.942	2.327		3.085	3.187	3.161	3.298	3.03	3.171	3.045	3.235	2.936	3.039	3.265	2.774	2.991	2.767	2.967	3.041	3.13	2.7	2.517	2.563	2.399	2.495	2.397	2.248	2.566	2.508	2.639	2.481	2.104	2.179	2.366	2.404	2.441	2.92	2.519
K2O	0.252	0.244	0.109	0.087	0.077	0.095	0.085	0.103	0.082	0.082	0.103	0.116	0.13		0.435	0.432	0.353	0.767	0.574	0.565	0.603	0.627	0.453	0.458	0.323	0.268	0.298	0.254	0.271	0.263	0.284	0.182	0.157	0.147	0.131	0.135	0.131	0.055	0.143	0.13	0.21	0.196	0.104	0.095	0.267	0.213	0.25	0.596	0.193
P2O5	0.095	0.094	0.106	0.098	0.097	0.089	0.1	0.087	0.101	0.102	0.11	0.084	0.079		0.205	0.212	0.199	0.255	0.243	0.249	0.248	0.272	0.178	0.186	0.243	0.168	0.229	0.183	0.208	0.197	0.188	0.132	0.117	0.135	0.115	0.132	0.139	0.112	0.131	0.112	0.155	0.108	0.106	0.085	0.111	0.112	0.101	0.127	0.121
Total	92.641	93.304	97.5321	93.106	97.5573	97.5338	97.6181	97.8299	92.815	97.2546	91.096	85.784	92.7933		93.328	98.6607	95.216	93.079	96.1729	97.1137	94.317	95.3523	96.0814	97.1775	97.0495	97.0843	97.6875	94.831	96.3219	97.4885	93.951	94.434	97.602	97.7848	95.461	97.688	97.5244	95.626	97.6814	97.6794	97.7235	92.635	97.9259	97.5905	97.392	97.6784	98.3933	98.0276	97.8358
LOI			3.49		1.62		1.44			2.93						2.46				2.32				2.63	2.34		1.68			2.14				1.37		1.36	1.52		1.53	1.56			0.95		4.06	0.99			1.04
FeO*/MgO	1.4463	1.39062	1.61451	1.55047	1.53919	1.42425	1.40108	1.32732	1.61121	1.65407	1.34169	1.40668	1.30153		1.51369	1.74104	1.38129	1.81581	1.73443	1.79434	1.84992	1.61996	1.44107	1.50273	1.66815	1.4351	1.43424	1.46513	1.44038	1.32954	1.50154	1.28666	1.22682	1.22036	1.27654	1.33173	1.28998	1.22733	1.38217	1.18049	1.1026	1.23606	1.27742	1.1835	1.15146	1.41119	1.33162	1.64437	1.36982
XRF (μg/g)
Sc	39.51	32.094	44.958	40.758	42.36		43.433		39.716	44.179		38.463			31.214	31.768	29.895	25.042		29.454	27.087			31.998	28.759		34.358	33.098		35.586	30.982	35.002		39.136	37.061	41.854	40.707	38.801	39.57	40.346		31.664	42.229		37.887	41.257			41.092
V	327.905	333.981	331.442	337.148	315.549		327.509		332.215	331.907		290.661			411.892	428.528	393.749	477.932		421.354	413.714			363.846	362.199		283.633	337.937		355.278	384.98	349.885		329.521	340.264	357.388	335.062	322.518	363.105	353.701		308.164	282.126		325.074	300.914			300.599
Cr	162.675	205.907	188.035	204.102	192.533		225.717		211.654	200.626		269.217			39.047	39.951	49.958	47.163		60.175	54.199			44.765	15.622		48.373	44.016		53.086	45.407	250.091		267.234	283.438	259.845	275.657	293.683	196.028	283.986		340.426	325.012		270.145	244.411			268.635
Co	46.343	40.838	47.16	44.34	44.338		46.429		45.906	46.998		41.271			54.337	49.952	49.043	49.507		37.628	48.631			53.925	38.871		45.473	46.599		51.181	45.078	46.758		46.231	48.672	47.763	47.022	46.333	51.13	48.344		45.785	49.801		47.623	45.548			41.646
Ni	66.365	69.317	71.785	68.89	73.922		78.008		74.636	74.293		66.008			56.042	42.38	48.483	29.132		24.633	37.898			52.585	29.624		47.748	53.868		61.067	54.229	100.153		100.451	115.05	102.388	116.616	116.451	116.13	114.519		82.875	94.076		77.985	62.095			70.996
Cu	182.318	231.298	224.531	161.933	198.482		189.585		171.219	203.169		143.523			147.67	157.6	154.823	55.04		57.342	53.755			186.083	160.91		129.427	179.405		177.408	193.462	143.23		178.874	193.163	181.938	174.991	151.651	198.783	183.798		136.255	147.915		141.469	171.696			298.401
Zn	64.703	84.12	82.686	77.282	76.642		78.465		75.049	81.151		73.312			113.264	120.766	105.141	142.165		123.346	120.136			79.956	116.81		95.972	90.356		91.574	101.243	52.114		80.573	77.679	81.325	78.917	75.846	84.654	77.87		101.95	79.008		43	70.639			70.34
Ga	16.331	17.379	16.378	16.684	16.811		16.489		16.645	17.426		14.586			19.734	20.003	19.488	23.033		21.032	21.444			18.939	20.35		19.617	19.092		19.015	18.506	17.812		18.37	17.331	18.853	17.785	16.141	18	17.8		17.652	16.316		17.469	17.746			17.058
Rb	3.866	5.642	4.036	bdl	4.004		0.67		bdl	2.454		bdl			5.307	7.8	4.501	10.522		7.237	7.265			3.201	4.94		5.867	3.158		2.756	2.185	0.027		4.312	3.029	3.879	0.647	bdl	5.039	1.756		bdl	1.698		5.531	1.123			0.9
Y	26.653	25.087	27.538	27.801	25.908		26.889		29.165	29.099		23.208			31.44	32.534	34.965	46.627		40.615	40.31			26.052	37.473		35.889	33.546		32.49	29.434	27.53		28.746	26.638	27.622	29.148	26.953	27.915	25.539		19.05	23.61		25.649	23.007			27.845
Sr	131.672	119.085	130.579	118.23	128.393		122.27		130.757	133.214		119.231			221.504	227.276	217.925	202.775		210.642	206.731			216.905	243.131		235.301	229.16		241.488	239.912	181.306		172.489	170.308	175.978	170.309	172.104	179.551	166.817		171.831	152.936		169.124	172.594			169.569
Zr	62.783	71.27	67.963	65.095	61.209		64.113		67.577	66.456		57.147			144.142	143.802	137.505	193.569		181.15	197.016			124.464	167.262		151.316	128.863		134.977	136.18	103.537		96.345	86.833	95.242	99.664	83.003	93.26	80.509		78.718	69.164		68.22	65.735			86.687
Nb	2.155	2.7	2.793	3.136	2.268		2.118		2.547	2.252		2.284			9.616	9.668	9.049	16.347		15.73	16.265			8.04	11.327		9.546	8.026		8.441	8.472	4.411		4.51	3.52	4.784	4.935	3.501	4.305	3.663		3.989	4.423		2.81	3.32			4.892
Ba	35.168	34.412	31.347	23.879	14.804		28.655		31.168	36.825		42.57			135.221	77.986	80.038	103.69		94.352	96.717			68.738	79.869		70.764	64.513		66.636	91.456	65.786		29.607	40.672	33.631	32.567	38.187	45.612	31.102		35.682	24.515		366.586	58.767			41.083
Pb	0.747	1.061	0.66	0.984	1.055		0.548		0.194	1.51		1.307			1.701	0.993	0.753	2.969		1.298	1.532			0.906	0.865		0.148	11.772		0.577	12.179	4.874		1.106	5.345	0.692	1.591	3.259	1.188	0.543		5.67	0.975		0.827	0.631			1.578
Lab.		AIST				AIST		AIST			AIST		AIST		AIST		AIST		AIST			AIST	AIST			AIST			AIST				AIST								AIST	AIST		AIST			AIST	AIST
ICP-MS (μg/g)
Li		8.8529				5.4094		8.4024			10.542		8.63475		5.79902		6.28683		5.94545			5.35135	7.11394			4.075			3.9348				6.07444								6.44952	9.94953		5.08836			5.21401	4.39454
Be		0.287993				0.33976		0.295981			0.315621		0.342622		0.639731		0.736056		0.807572			0.740514	0.683971			0.618833			0.64546				0.449544								0.547992	0.644345		0.346241			0.366144	0.538566
V		320.771				351.357		329.288			347.955		318.399		419.975		398.038		410.154			403.428	359.614			362.312			332.266				329.755								277.535	307.68		285.454			328.785	427.968
Cr		194.106				332.061		262.386			250.107		245.976		47.0686		59.5827		68.88			61.2081	46.6682			53.9695			49.8224				278.149								286.253	389.375		346.505			314.99	49.8107
Ni		68.7171				89.0658		84.1628			64.051		63.7888		47.9731		48.0336		25.8885			28.2981	52.5344			55.6798			53.7773				101.206								117.571	87.5694		103.647			81.6062	43.0308
Rb		5.44922				1.17613		1.37542			0.696639		0.987386		6.8902		6.04887		7.14613			10.7662	2.50719			3.53553			3.57236				1.90019								2.85989	1.38686		1.08893			1.86946	3.17063
Sr		128.225				102.619		108.526			128.549		117.22		217.362		213.547		198.728			192.767	204.341			220.965			222.181				152.288								164.402	169.751		145.219			179.476	169.238
Y		27.549				29.5205		26.9863			28.5261		28.8119		33.4141		36.8235		42.1005			41.8679	28.1898			32.1607			31.8221				27.6442								33.693	18.8679		22.1393			26.3937	32.05
Zr		68.6487				72.9275		69.0282			76.7999		69.8332		152.519		150.017		186.097			201.06	133.806			126.633			146.506				92.9679								125.06	84.6964		69.5203			76.7251	68.9371
Nb		3.23489				3.42992		3.28469			3.33354		3.02324		11.1517		10.9697		18.19			19.8349	9.78561			9.27558			10.7331				5.12398								6.85608	5.30453		4.31705			5.18328	6.47718
Cs		0.0908633				0.00929518		0.0102094			0.0124713		0.0109932		0.0498471		0.0266703		0.021363			0.0324187	0.0200115			0.0225649			0.0215127				0.0319596								0.0490245	0.0181155		0.0280117			0.0153724	0.0310488
Ba		33.0734				13.5348		14.7574			18.1069		16.8574		108.651		59.3529		76.6587			105.295	50.2028			41.6245			47.2356				19.8923								41.1065	24.0258		18.8931			38.2588	38.4237
La		2.97705				3.24099		3.09796			3.446		3.07668		10.1611		10.1194		15.2384			16.2448	8.39001			8.59671			9.40006				4.72453								6.68099	5.0474		3.93435			4.54349	5.28522
Ce		8.63076				9.22703		8.8098			9.82519		9.06571		25.7274		25.751		36.53			38.8768	21.4758			21.8924			24.2281				13.3848								18.3358	12.8517		10.7499			12.2625	14.2871
Pr		1.38364				1.48152		1.4071			1.59389		1.45604		3.5658		3.62638		4.83388			5.1416	3.00599			3.11071			3.39402				2.04493								2.72666	1.82426		1.58274			1.83884	2.15634
Nd		7.6182				8.28813		7.79903			8.82473		8.231		17.4002		18.0393		22.5768			23.5615	14.6932			15.3954			17.0932				10.5558								14.0628	9.05293		8.38695			9.83605	11.3572
Sm		2.72564				2.98987		2.74896			3.17456		2.91773		4.8441		5.1314		6.08622			6.12477	4.22551			4.56889			4.85071				3.41172								4.37327	2.59514		2.66292			3.17345	3.72616
Eu		1.04429				1.11883		1.07605			1.17498		1.12117		1.66558		1.74021		2.00142			1.98822	1.50208			1.6206			1.72019				1.20722								1.50991	0.960953		0.970196			1.20306	1.42568
Gd		3.90014				4.20788		3.84697			4.30556		4.06581		5.57444		6.1339		7.13738			6.94022	4.88178			5.44759			5.81035				4.33673								5.43797	3.03486		3.30591			4.18156	4.77609
Tb		0.687166				0.750182		0.682368			0.759388		0.707273		0.924665		1.03463		1.17412			1.1749	0.808999			0.901062			0.952487				0.753742								0.921435	0.521749		0.577184			0.73075	0.837037
Dy		4.5738				4.95232		4.51042			4.9305		4.78336		5.79017		6.46742		7.30383			7.34787	4.89093			5.67388			5.94489				4.76523								5.77061	3.34749		3.73682			4.57139	5.41028
Ho		0.975276				1.04501		0.964753			1.02992		1.01117		1.2142		1.31261		1.51743			1.49296	1.02133			1.13827			1.19191				0.999548								1.20259	0.690111		0.791997			0.965872	1.1456
Er		2.74598				3.05478		2.70651			2.94608		2.82656		3.36243		3.69965		4.21658			4.1841	2.7777			3.17365			3.31565				2.78929								3.31759	1.92299		2.20126			2.68882	3.23302
Tm		0.412185				0.434178		0.401569			0.431966		0.429357		0.493949		0.530374		0.602562			0.620077	0.405885			0.461567			0.472031				0.399763								0.472619	0.280583		0.323348			0.386313	0.478618
Yb		2.59763				2.83659		2.59004			2.83015		2.66223		3.13694		3.41172		3.9529			4.02919	2.54884			2.94305			3.10523				2.61526								3.00234	1.74782		2.05958			2.47033	3.10319
Lu		0.38896				0.434183		0.390771			0.417159		0.40864		0.439294		0.505131		0.588635			0.576674	0.360646			0.428424			0.449083				0.37529								0.444783	0.248894		0.294378			0.349676	0.452743
Hf		1.95307				2.13424		1.94739			2.18651		1.98335		3.95396		3.87477		4.71935			5.09872	3.44054			3.34154			3.92686				2.59055								3.20267	2.30791		1.82425			2.17996	2.11471
Ta		0.229438				0.246146		0.228857			0.228612		0.211998		0.777304		0.767983		1.24287			1.35471	0.660358			0.629931			0.759658				0.364384								0.476272	0.366887		0.297263			0.37159	0.451103
Pb		0.253604				0.208778		0.209933			0.370418		0.381944		1.51526		0.760342		0.969905			0.865832	0.437484			0.62108			0.544701				0.471193								0.493863	0.468171		0.415709			0.271523	0.352119
Th		0.252718				0.281547		0.249903			0.265922		0.245113		1.04419		1.04694		2.14656			2.37408	0.803879			0.776682			0.926726				0.447454								0.666501	0.435106		0.346909			0.382521	0.454415
U		0.0783873				0.0917303		0.0807317			0.135576		0.0879176		0.353014		0.34518		0.647518			0.69451	0.259502			0.247128			0.301744				0.140818								0.204366	0.165593		0.104395			0.126687	0.129922
Ce/Pb		34.0324				44.1955		41.9648			26.5246		23.7357		16.9788		33.8676		37.6635			44.9011	49.0892			35.2489			44.4796				28.4062								37.1273	27.4509		25.8592			45.162	40.5745
Nb/U		41.268				37.3914		40.6865			24.588		34.3872		31.5899		31.7797		28.0919			28.5596	37.7092			37.5336			35.5702				36.3872								33.5481	32.0336		41.3531			40.914	49.8542
Ba/Nb						3.94611
Note: All these data are from Ichiyama et al., 2026. Lithos.
The sample marked by red colour was used to measure water content in this study.
							Ba/Nb	5.57252		Normal MORB	Ba	Nb	Ba/Nb		Ce/Pb
											25	4.56	5.48246		24.3
											Be	Rb						14.8
											0.76	2.25			Rb/La
															0.462963
											La
											4.86
											U
											0.083				3.7037
										EMORB	Ba	Nb	Ba/Nb
											125	17.07	7.32279
											Rb
											10.56
											U
											0.386
																		Kerguelen
																		Nb	3.5	3.4	3.7	3	3.5	3.6	2.7	3.1	3.8	15.9	20.3	23.7	4.6	5	4.8	5	4.1	5	5	5.1	4.9
																		Ba	36	37	37	35	36	38	32	35	37	136	147	170	39	41	42	41	39	41	41	41	40
[truncated: 12 more columns]
